# Supplementary material
Source: PubMed Central journal article supplement (PMC3910360)
Supplement: 97320630091031S1.pdf [file 97320630091031S1.pdf]

## Supplementary material:

**Table 1:** Docking score (S) and Interaction sites of neem phytochemicals against PEPCK enzyme

| No. | Compound Name                                                | Score (S) | Interaction Sites                                           |
|-----|--------------------------------------------------------------|-----------|-------------------------------------------------------------|
| 1   | 3-Deacetyl-3-cinnamoyl-azadirachtin                          | -37.57    | A292,A297,L293,M295,G289,T343, P528,P530,G531               |
| 2   | Isoazadirolide                                               | -34.79    | A292,G289                                                   |
| 3   | Meliatetraolenone                                            | -33.20    | S286,C288,G289,A292,T291,A310,A311,L290,L244,G329,A405,A287 |
| 4   | Xanthophylls                                                 | -32.96    | T235,A405,A403                                              |
| 5   | 7 $\alpha$ -Senecioid-(7-deacetyl)-23-O-methyl nimo-cinolide | -32.38    | C288,G289,L290,A310,A311,A405, T291,A292,P530               |
| 6   | Azadirachtanin                                               | -31.71    | C288,G289,A292,L290,V335,T291, A436                         |
| 7   | 6-O-ACETYLNIMBANDIOL                                         | -31.33    | T291,A310,A405,L290,A311,S286, A87,T235                     |
| 8   | Beta-sitosterol                                              | -30.87    | P337,P402                                                   |
| 9   | Nimocinolide                                                 | -30.30    | A292,G338,A436,T291,A310,A311,H264,L244,L290,A405,P333,V335 |
| 10  | Rutin                                                        | -30.23    | S286,C288,G289,A287,L290,A436,A292,V335,T291,A310,A311,A405 |
